# Supplementary material for: Zinc-based deep eutectic solvent-mediated hydroxylation and demethoxylation of lignin for the production of wood adhesive
Source: Royal Society of Chemistry journal article supplement (doi:10.1039/c6ra18290a), 2016-01-01
Supplement: c6ra18290a1.pdf [file c6ra18290a1.pdf]

## Zinc-based deep eutectic solvent-mediated hydroxylation and demethoxylation of lignin for the production of wood adhesive

by

Shu Hong, Hailan Lian\*, Xiang Sun, Dong Pan, Arturo Carranza, John A. Pojman and  
Josué D. Mota-Morales\*

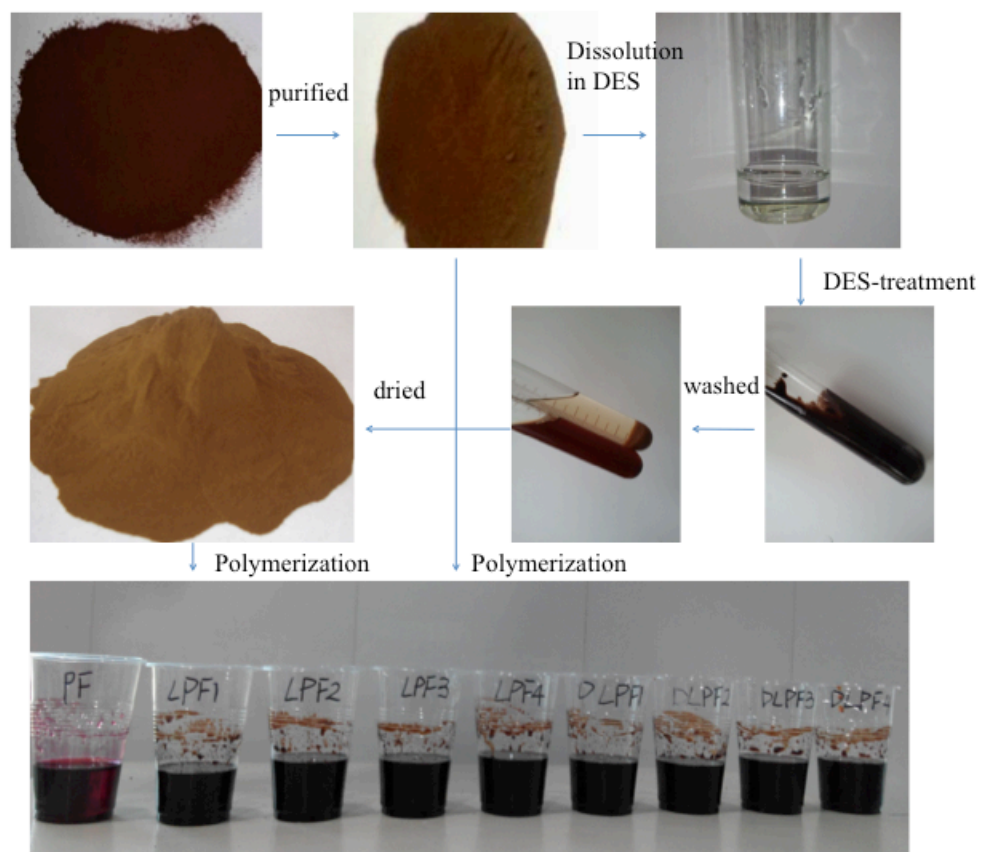

Figure S.1. Photographs of lignin during the DES-treatment and polymerization.

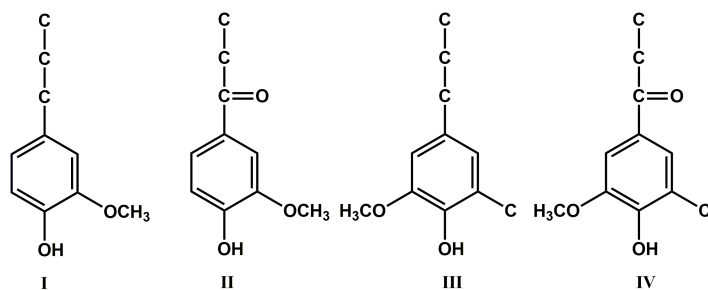

Figure S.2. Schematic representation of the structural units of lignin as detected by UV-Vis.

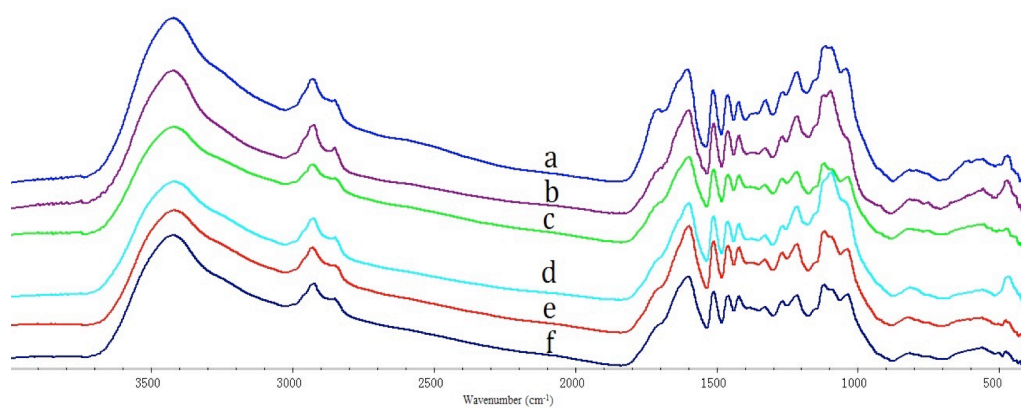

Figure S.3. FT-IR spectra of lignin in the region from 400 to 4000  $\text{cm}^{-1}$ . From top to bottom: PL (a), DL1 (b), DL2 (c), DL3 (d), DL4 (e), DL5 (f).

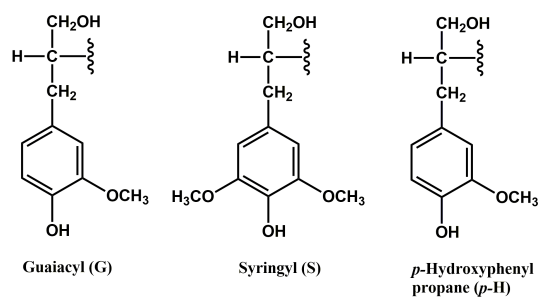

Figure S.4. Schematic representation of the structural units of lignin.

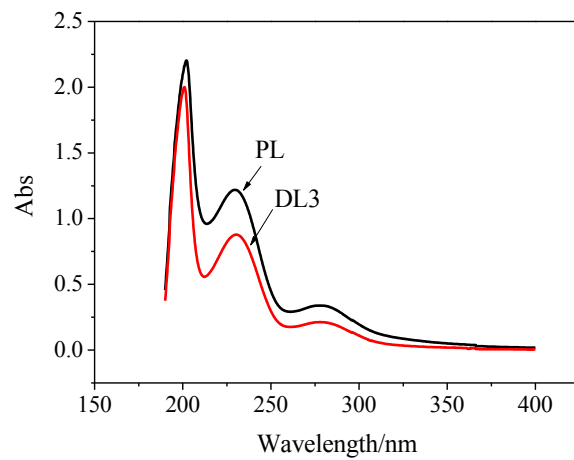

Figure S.5. UV-vis spectra of PL and DL3 in dioxane-water neutral solution.

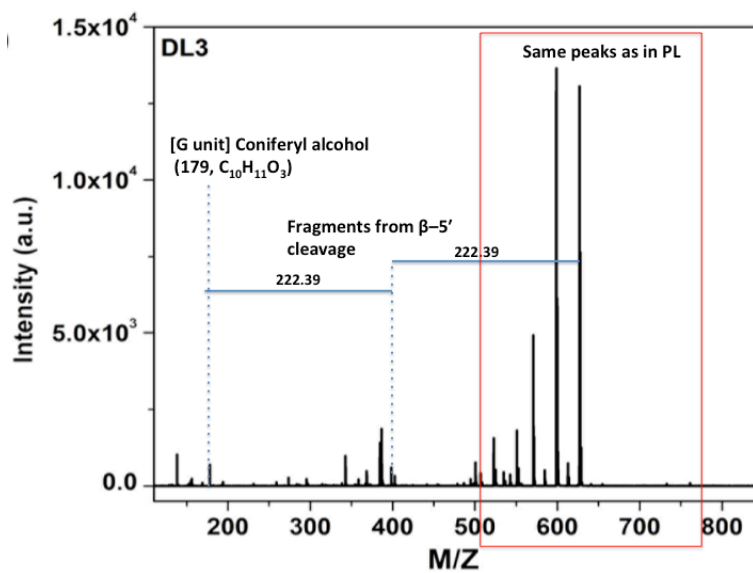

Figure S.6. Details of NALDI-TOF spectrum of DL3.
